# Supplementary material
Source: PubMed Central journal article supplement (PMC3418722)
Supplement: supp_blood-2012-01-404699_blood-2012-01-404699-1.pdf [file supp_blood-2012-01-404699_blood-2012-01-404699-1.pdf]

**Supplementary figures and tables**

**Suppl. Fig. S1. Sorting strategy for the isolation of phenotypically defined LT-HSC, ST-HSC and GMP.** LT-HSC, ST-HSC and GMP were sorted for gene expression analysis as indicated.

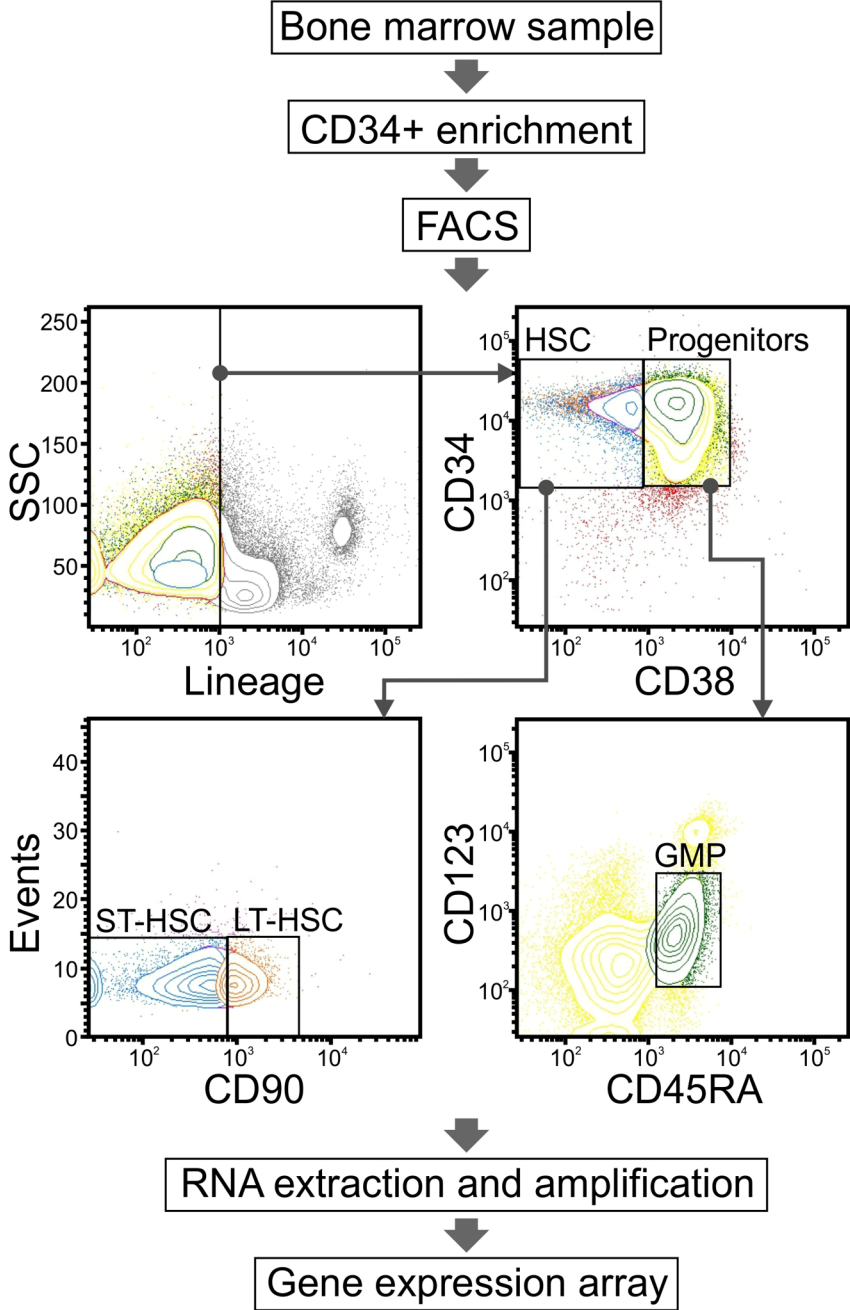

**Suppl. Fig. S2. Lineage exclusion is critical for stem and progenitor sorting.** Analysis of lineage positive cells in phenotypic stem (LT-HSC and ST-HSC) and granulocyte-macrophage progenitor (GMP) compartments from bone marrow of a healthy donor. Percentages indicate the percentage of lineage<sup>+</sup> cells in each compartment. Surface markers are indicated.

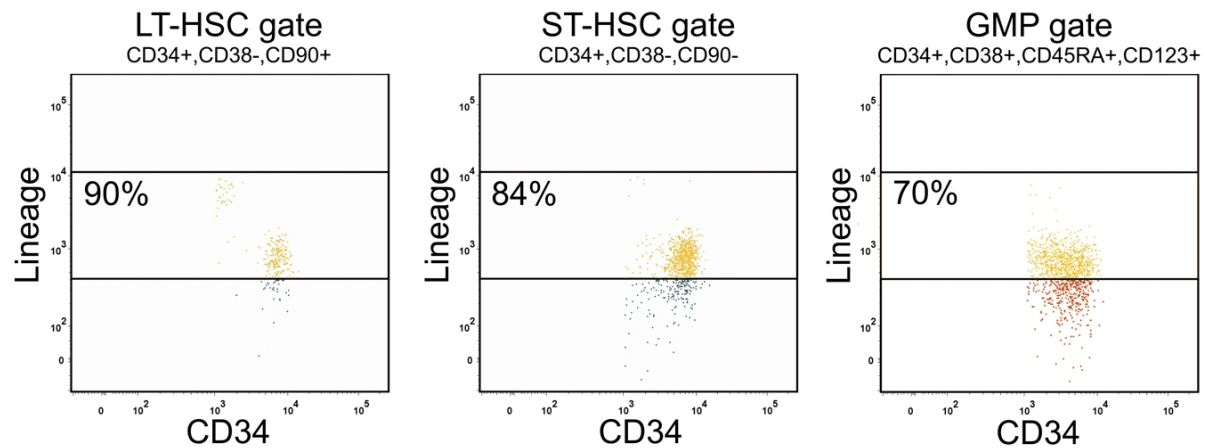

**Suppl. Fig. S3. Principal component analysis separates phenotypic AML-LT-HSC, AML-ST-HSC, and AML-GMP and shows resemblance to the corresponding compartments in healthy controls. A)** Principal component analysis of differentially expressed genes within AML with monosomy 7 separates phenotypically defined AML LT-HSC, ST-HSC and GMP. **B)** Phenotypically defined compartments in AML with monosomy 7 (lighter colors) cluster together with phenotypically defined LT-HSC, ST-HSC and GMP of healthy controls (shown in darker colors) in principal component analysis.

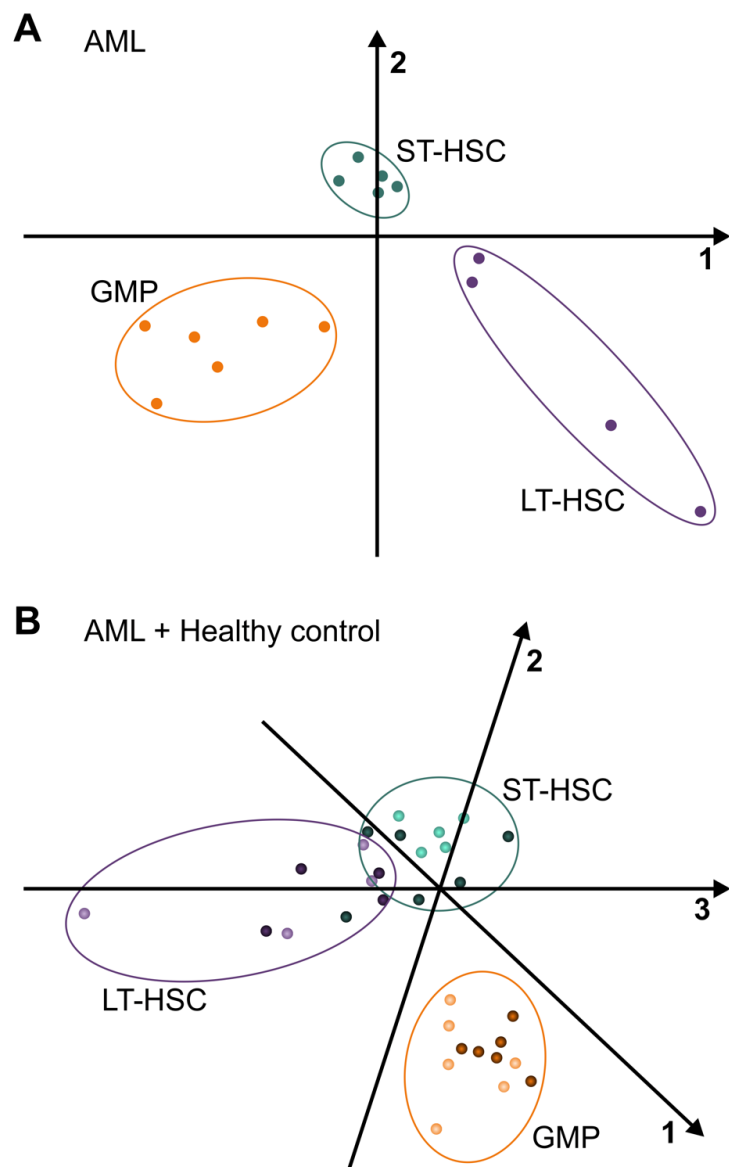

**Suppl. Fig. S4. Chromosome 7 aberrations are detectable in the earliest HSC stages by fluorescence in-situ hybridization (FISH).** Sorted hematopoietic stem cells of AML patients bearing monosomy 7 were hybridized with the Vysis LSI D7S486 (7q31) SpectrumOrange/ CEP 7 SpectrumGreen Probes. Standard magnification is shown in the upper panels. A higher magnification of the cells indicated with a yellow arrow in the upper panel, showing a representative FISH signal, is shown in the lower left panel. The lower right panel shows the percentage of nuclei counted bearing monosomy 7 (-7) or a normal karyotype (NK). **A)** Normal FISH pattern with two individual green (centromere chromosome 7) and orange (7q31) signals per nuclear section in healthy control LT-HSC. **B)** AML-LT-HSC. **C)** AML ST-HSC.

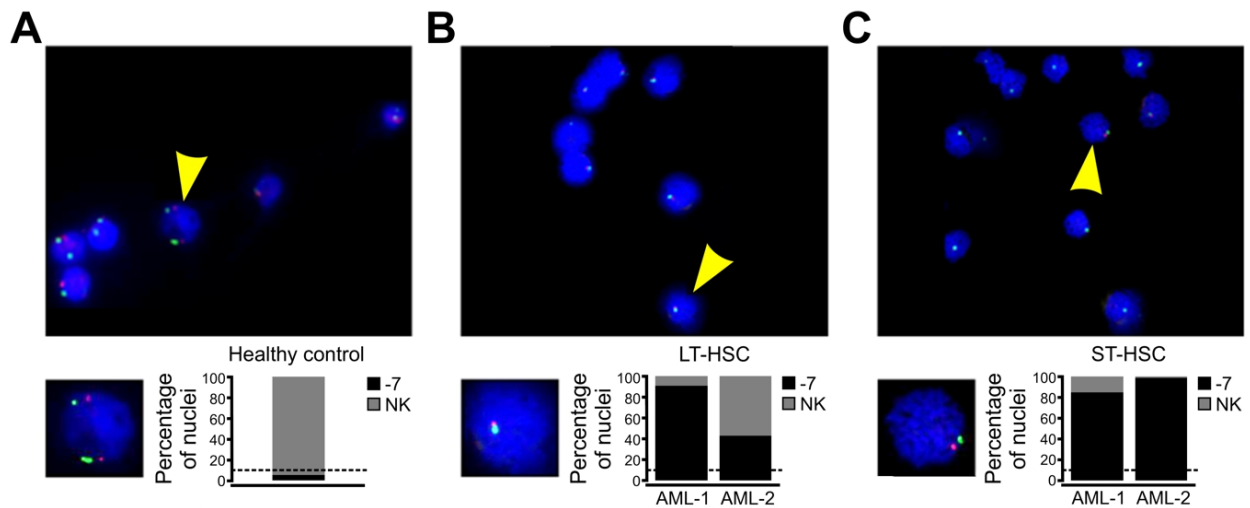

**Suppl. Fig. S5. Overexpression of *IL1RAP* is highly significant in all hematopoietic stem and progenitor compartments studied.** Venn diagram showing the three most significant genes commonly dysregulated in AML with monosomy 7 in phenotypically defined LT-HSC (purple), ST-HSC (blue), and GMP (orange) compartments. Heat maps show log<sub>2</sub>-transformed expression levels of all differentially expressed genes in LT-HSC, ST-HSC, and GMP of AML patients (AML) compared with healthy controls (HC). (Cutoff: fold: 1.5, p < 0.016).

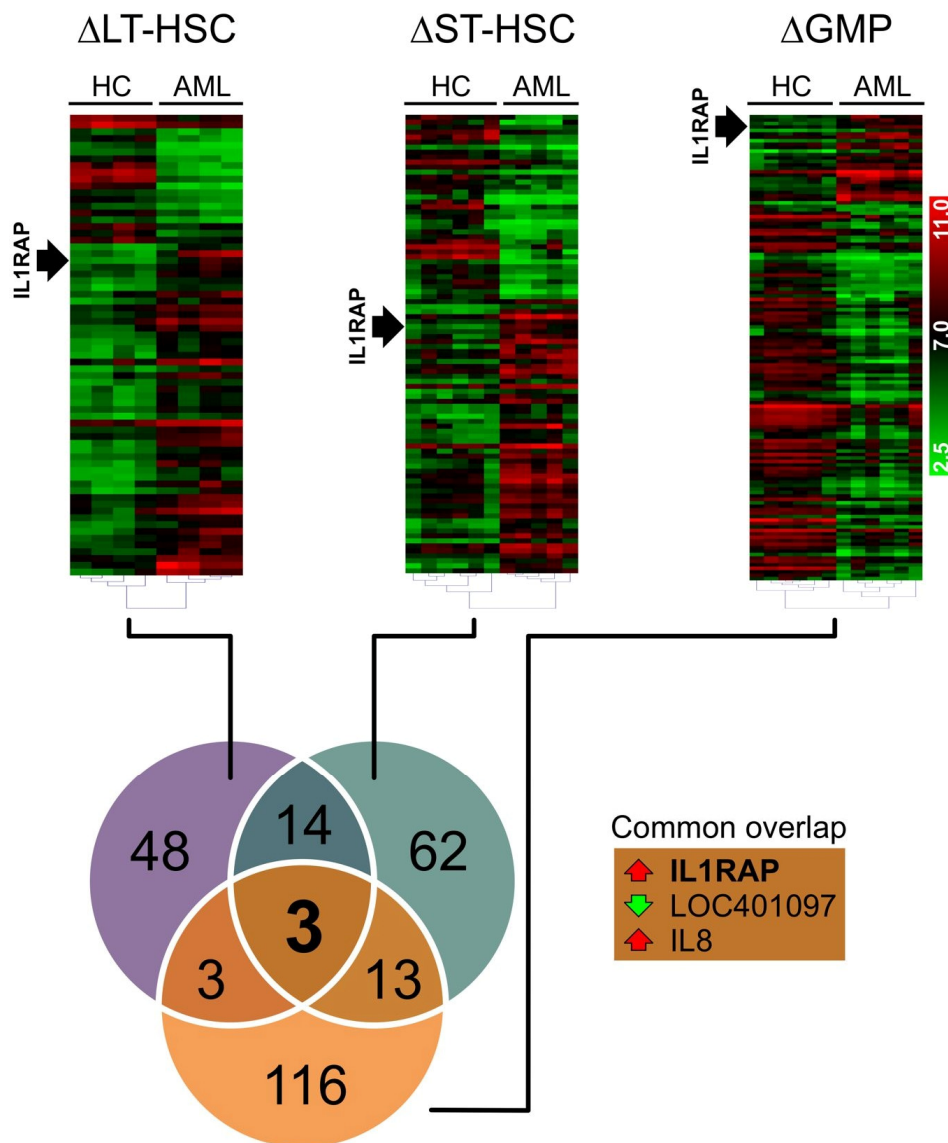

**Suppl. Fig. S6. Unfractionated blasts of patients with -7 AML show similar levels of *IL1RAP* expression as healthy CD34<sup>+</sup> cells.** Box plots showing *IL1RAP* expression levels in healthy CD34<sup>+</sup> cells (n=11) and in AML blasts with -7/7q chromosomal aberrations (n=18). The central box represents the values from the lower to the upper quartile (25<sup>th</sup> to 75<sup>th</sup> percentile). The middle square represents the mean and the median is indicated by the horizontal line. A line extends from the minimum to the maximum value.

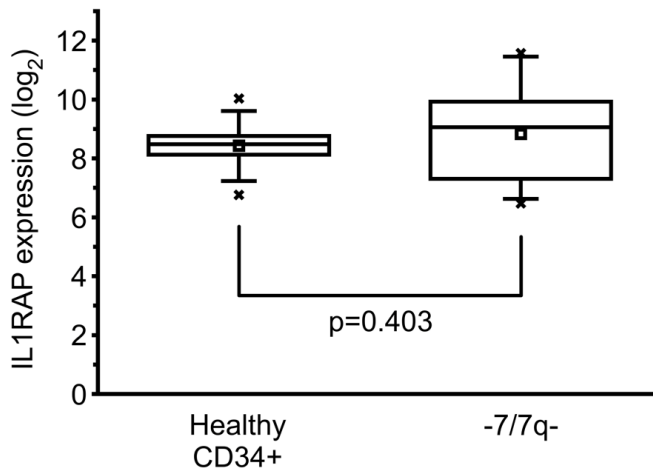

**Suppl. Fig. S7. Validation of gene expression by RT-PCR of additional dysregulated genes in AML with monosomy 7.**

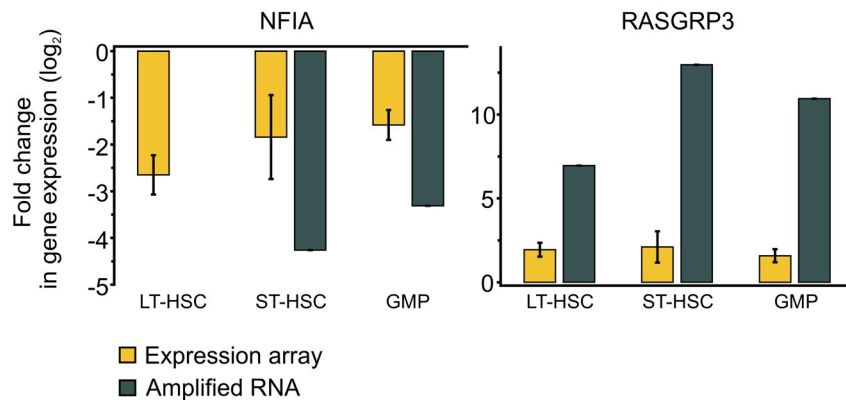

**Suppl. Fig. S8. High *IL1RAP* expression levels are associated with poor overall survival in three different clinical cohorts of AML patients with normal karyotype.** AML patients with normal karyotype are dichotomized using the 75<sup>th</sup> percentile as a cutoff for expression of *IL1RAP* in each of the published GEO datasets GSE12417 (U133plus2), GSE12417 (U133A), and GSE10358. **A), B), C):** Kaplan-Meier plots of overall survival of patients with normal karyotype AML with high (black line) or low (red line) *IL1RAP* expression from the aforementioned datasets. Patients with high *IL1RAP* expression (cutoff at 75<sup>th</sup> percentile) show significantly inferior clinical outcome in each individual dataset. P-values (log-rank test) are indicated. **D)** Combined Kaplan-Meier plot of overall survival in all examined cohorts irrespective of *IL1RAP* status. The graph shows superimposable survival curves (p=0.1227, log-rank test), indicating that the patients have very similar overall survival in these datasets and can be combined for further analysis.

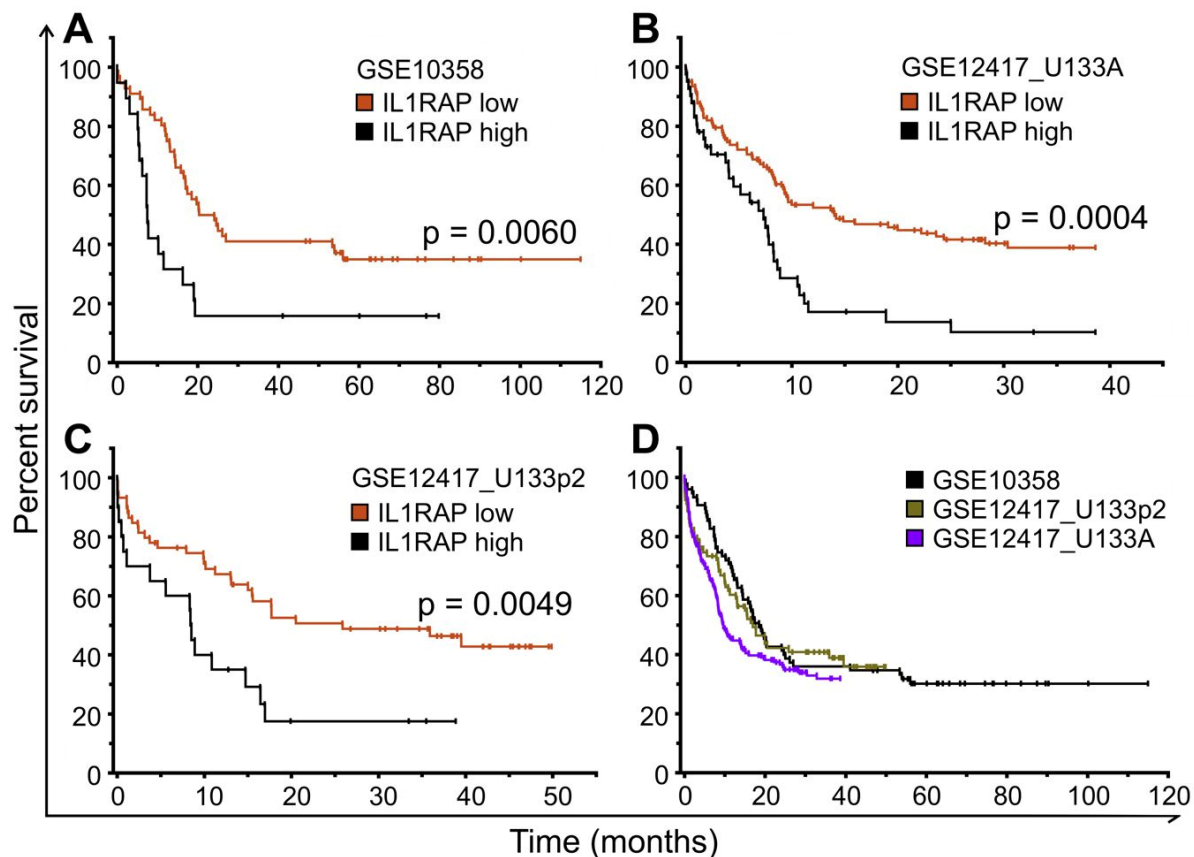

**Suppl. Fig. S9. IL1RAP protein knockdown levels in AML cell lines.** IL1RAP protein knockdown levels were determined by flow cytometry in THP-1, HL-60, HEL, OCI-AML3 cells infected with two different IL1RAP shRNA constructs. Relative expression levels normalized to a non-silencing control shRNA are shown. Mean values and standard deviation are shown.

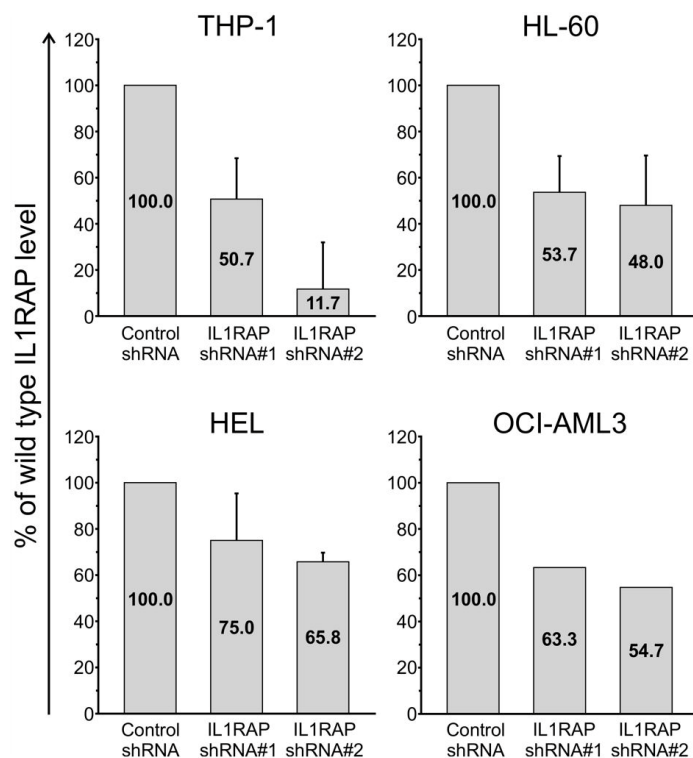



**Suppl. Fig S10. Parallel detection of IL1RAP mRNA (left panel) and protein (right panel) in 3 AML cell lines with different expression levels.** mRNA and protein levels of IL1RAP in 3 cell lines with different expression levels. *IL1RAP* mRNA was measured by quantitative RT-PCR and normalized to GAPDH mRNA. IL1RAP protein levels were measured by FACS. Mean and standard deviation are shown.

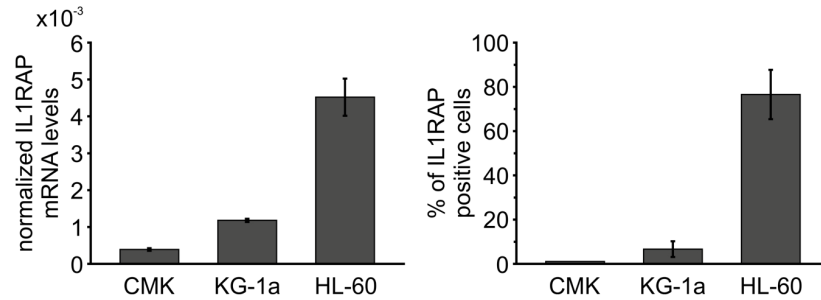

**Suppl. Fig. S11. IL1RAP knockdown does not cause significant changes of the cell cycle profile in THP-1 cells.** THP-1 cells were infected with a non-silencing or IL1RAP-specific shRNA constructs, and DNA content was analyzed using Hoechst 33342 staining. A representative histogram is shown in the upper panel. Mean and standard deviation of 3 independent experiments are plotted in the lower panel.

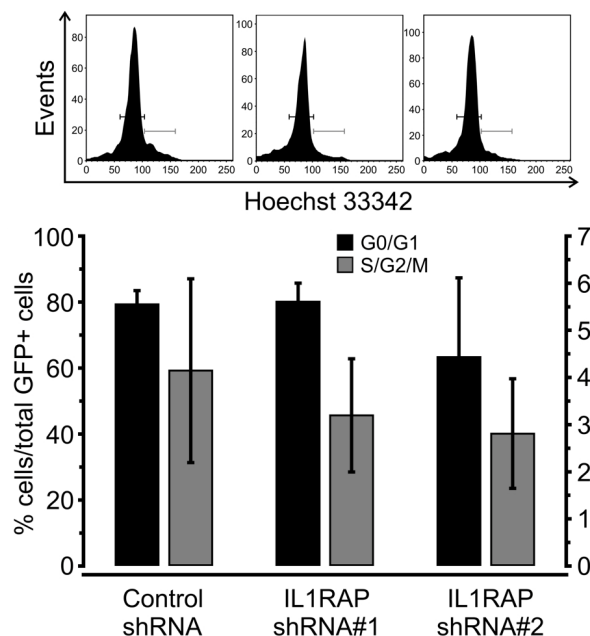

**Suppl. Fig. S12. Time course of cell death in THP-1 cells.** Analysis of apoptosis/necrosis with Annexin V/DAPI in THP-1 cells infected with control and IL1RAP shRNAs. Mean and standard deviation of 3 independent experiments are shown.

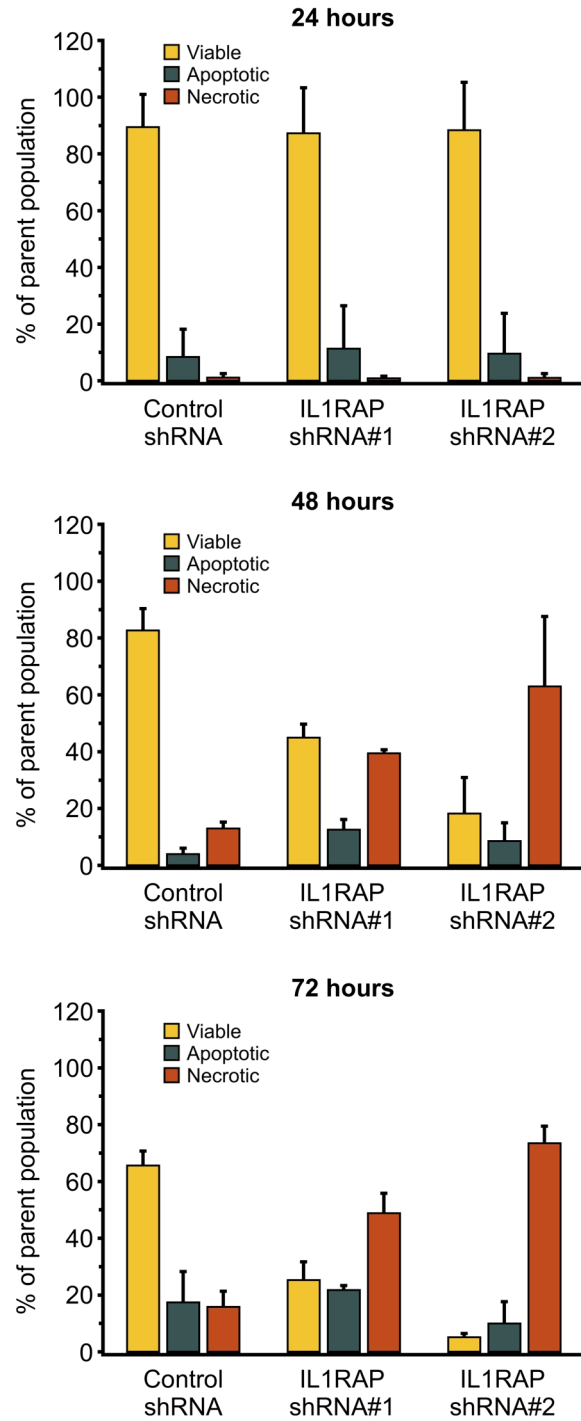

## Supplementary tables

Table S1. AML patients characteristics

| Specimen | Age at diagnosis/gender | Karyotype                                |
|----------|-------------------------|------------------------------------------|
| AML-1    | NA/F                    | 45,XX,-7[3]/46,XX[1]                     |
| AML-2    | 58/M                    | 45,XY,-7[4]/45,XY,-7,del(12)(p11p13)[16] |
| AML-3    | 78/M                    | 46,XY,-7,+19[25]                         |
| AML-4    | 61/F                    | 45,XX,-7[20]                             |
| AML-5    | 77/M                    | 45,XY,-7[21]                             |
| AML-6    | 58/F                    | 45,XX,-7[17]/45,XX,-7,add(15)(p15)[1]    |
| AML-7    | NA/F                    | 45,XX,-7[5]/46,XX[15]                    |
| AML-8    | 60/M                    | 45,XY,-7[20]                             |
| AML-9    | 26/F                    | 45,XX,-7[6]                              |
| AML-10   | 62/F                    | 45,XX,-7[15]                             |
| AML-11   | 80/F                    | 45,XX,-7[23]                             |
| AML-12   | 50/M                    | 46,XY[20] <sup>a</sup>                   |
| AML-13   | 55/M                    | 46,XY[20] <sup>a</sup>                   |
| AML-14   | 56/M                    | 46,XY[20] <sup>a</sup>                   |
| AML-15   | 56/M                    | 46,XY[20] <sup>a</sup>                   |
| AML-16   | 60/F                    | 46,XX[20] <sup>a</sup>                   |

<sup>a</sup> Normal Karyotype is defined by 20 normal bone marrow metaphases, FISH negative for aberrations in chromosomes 5 and 7, and normal by PCR for BCR/ABL, PML/RAR $\alpha$ , AML1/ETO, CBF $\beta$ /MYH11, and MLL-PTD. NA: not available

**Table S2. Frequency of sorted populations in AML and healthy controls [% of total Lin<sup>-</sup> cells]**

|                | Specimen | Age/gender | Karyotype                             | %Lin <sup>-</sup><br>CD34 <sup>+</sup> CD38 <sup>-</sup><br>CD90 <sup>+</sup> | %Lin <sup>-</sup><br>CD34 <sup>+</sup> CD38 <sup>-</sup><br>CD90 <sup>-</sup> | %Lin <sup>-</sup><br>CD34 <sup>+</sup> CD38 <sup>+</sup> CD45RA <sup>+</sup><br>CD123 <sup>+</sup> |
|----------------|----------|------------|---------------------------------------|-------------------------------------------------------------------------------|-------------------------------------------------------------------------------|----------------------------------------------------------------------------------------------------|
| <b>AML</b>     | AML-5    | 77/M       | 45,XY,-7[21]                          | 6.62                                                                          | 41.24                                                                         | 21.95                                                                                              |
|                | AML-6    | 58/F       | 45,XX,-7[17]/45,XX,-7,add(15)(p15)[1] | 0.13                                                                          | 0.95                                                                          | 71.54                                                                                              |
|                | AML-8    | 60/M       | 45,XY,-7[20]                          | 0.14                                                                          | 80.58                                                                         | 15.51                                                                                              |
|                | AML-9    | 26/F       | 45,XX,-7[6]                           | 0.08                                                                          | 92.47                                                                         | 4.79                                                                                               |
|                | AML-10   | 62/F       | 45,XX,-7[15]                          | 0.51                                                                          | 50.26                                                                         | 18.25                                                                                              |
|                | AML-11   | 80/F       | 45,XX,-7[23]                          | 1.10                                                                          | 6.17                                                                          | 73.46                                                                                              |
| <b>HEALTHY</b> | HBM-1    | 52/F       |                                       | 1.93                                                                          | 8.23                                                                          | 29.5                                                                                               |
|                | HBM-2    | 40/M       |                                       | 1.64                                                                          | 14.55                                                                         | 25.3                                                                                               |
|                | HBM-3    | 48/F       |                                       | 1.21                                                                          | 9.24                                                                          | 27.5                                                                                               |
|                | HBM-4    | 47/M       |                                       | 1.47                                                                          | 11.09                                                                         | 31.4                                                                                               |
|                | HBM-5    | 48/F       |                                       | 1.71                                                                          | 8.44                                                                          | 27.6                                                                                               |
|                | HBM-6    | 47/M       |                                       | 1.71                                                                          | 8.87                                                                          | 25.5                                                                                               |

**Table S3. MDS patients characteristics**

| <b>Specimen</b> | <b>Disease</b>     | <b>% blasts</b> | <b>Karyotype</b>                                                                                                                                 |
|-----------------|--------------------|-----------------|--------------------------------------------------------------------------------------------------------------------------------------------------|
| MDS-1           | MDS (RAEB)/<br>AML | 10              | 46,XX[20]                                                                                                                                        |
| MDS-2           | MDS (RAEB)         | 15              | 46,XY,del(5q),del(7q),del(20q)[6]                                                                                                                |
| MDS-3           | MDS (RAEB)         | 10-20           | 46,XY,del(7)(q21)[12]/46,XY,-7,+mar[8]                                                                                                           |
| MDS-4           | MDS (RCMD)         | 3               | 46,XX,del(11)(p11.2)[5]/46,XX[15]                                                                                                                |
| MDS-5           | MDS (RCMD)         | <5              | 44,XX,del(5)(q13q33),-7,del(10)(q24),<br>add(12)(p11.2),-20[20]                                                                                  |
| MDS-6           | MDS(RCMD)          | 2               | 46,XY,del(5)(q13q33)x2,del(7)(q22),add(17)(p11.2)<br>[14]/46,XY,t(3;14)(q21;q24),del(5)(q13q33),del(7)(q<br>22),add(17)(p11.2),del(20)(q11.2)[6] |
| MDS-7           | MDS/AML            | 80              | 47,XY,+8[20]                                                                                                                                     |

**Table S4. Healthy control characteristics**

| <b>Specimen</b> | <b>Age at diagnosis/gender</b> | <b>Karyotype</b> |
|-----------------|--------------------------------|------------------|
| HBM-1           | 52/F                           | NA               |
| HBM-2           | 40/M                           | NA               |
| HBM-3           | 48/F                           | NA               |
| HBM-4           | 47/M                           | NA               |
| HBM-5           | 48/F                           | NA               |
| HBM-6           | 47/M                           | NA               |
| HBM-7           | 51/M                           | NA               |
| HBM-8           | 43/F                           | NA               |
| HBM-9           | 26/M                           | NA               |

**NA: not available**

**Table S5. shRNA oligonucleotide sequences**

| <b>shRNA oligonucleotide</b> | <b>Sequence</b>                      |
|------------------------------|--------------------------------------|
| Luciferase Control shRNA     | 5'-gtgCGTgTtagTactaatcctattt-3'      |
| IL1RAP shRNA 1               | 5'- tggccttactctgatctggtattggacta-3' |
| IL1RAP shRNA 2               | 5'-cgggcattaattgatttctactatattc-3'   |

**Table S6. Differentially expressed genes in distinct compartments in AML with monosomy 7.**

**EXCEL SPREADSHEET, please see separately uploaded file**
